# Supplementary material for: ONLINE-TICS: Internet-Delivered Behavioral Treatment for Patients with Chronic Tic Disorders
Source: MDPI journal article supplement (doi:10.3390/jcm11010250), 2022-01-04
Supplement: s1 [file s1]

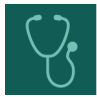

Supplementary Material

**Table S1.** Estimates for therapeutic alliance (according to WAI-SR) by treatment and visit – linear regression model (stratified for center and tic medication)

| Intervention group | Reference group | Visit | Cases included | Estimate (95%-CI)   | p-value      |
|--------------------|-----------------|-------|----------------|---------------------|--------------|
| iCBIT              | placebo         | V2    | 116/137        | 3.61 (0.13; 7.10)   | <b>0.042</b> |
|                    |                 | V3    | 118/137        | 2.17 (–1.80; 6.13)  | 0.281        |
|                    |                 | V4    | 118/137        | 3.09 (–0.66; 6.84)  | 0.106        |
|                    |                 | V5    | 118/137        | 3.36 (–0.43; 7.14)  | 0.082        |
| iCBIT              | f2f CBIT        | V2    | 80/91          | –0.16 (–6.34; 6.02) | 0.959        |
|                    |                 | V3    | 80/91          | –2.45 (–8.99; 4.09) | 0.458        |
|                    |                 | V4    | 80/91          | –2.36 (–8.92; 4.21) | 0.476        |
|                    |                 | V5    | 80/91          | –2.65 (–9.12; 3.81) | 0.416        |
| f2f CBIT           | placebo         | V2    | 82/94          | –0.13 (–5.97; 5.71) | 0.965        |
|                    |                 | V3    | 84/94          | –1.93 (–8.35; 4.49) | 0.551        |
|                    |                 | V4    | 84/94          | –3.55 (–9.70; 2.60) | 0.254        |
|                    |                 | V5    | 84/94          | –3.39 (–9.67; 2.89) | 0.285        |

iCBIT: internet-delivered Comprehensive Behavioral Intervention for Tics; f2f CBIT: face-to-face Comprehensive Behavioral Intervention for Tics; CI: Confidence Interval.

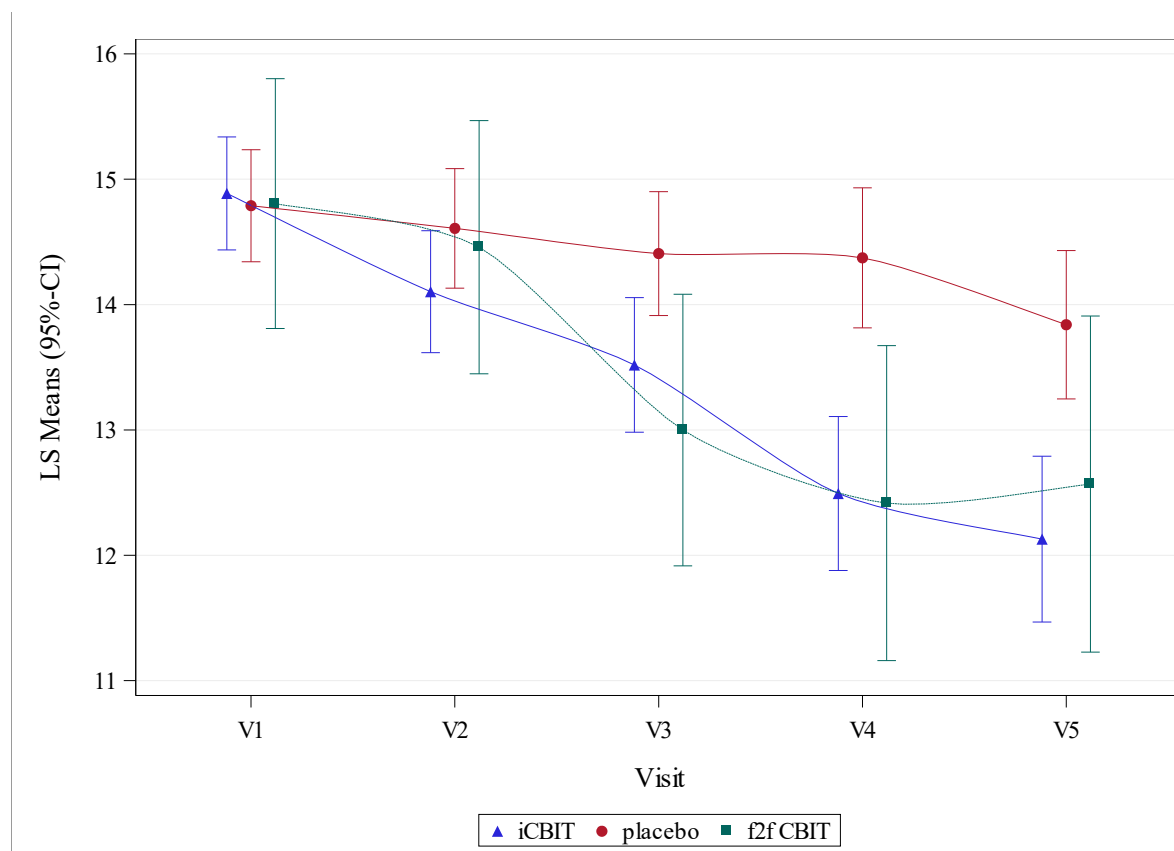

**Figure S1.** Course of YGTSS-MTS across all visits in all study arms. iCBIT: internet-delivered Comprehensive Behavioral Intervention for Tics; f2f CBIT: face-to-face Comprehensive Behavioral Intervention for Tics.

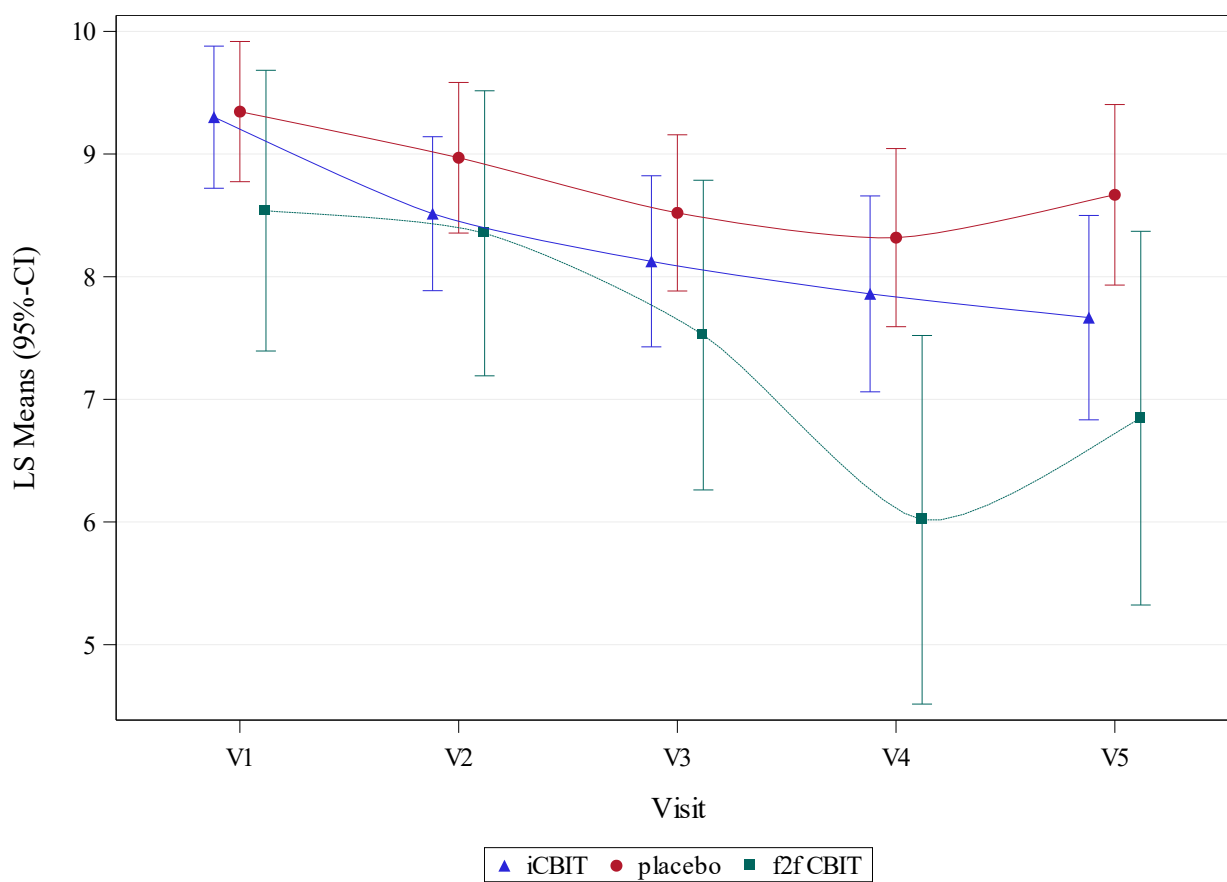

**Figure S2.** Course of YGTSS-VTS across all visits in all study arms.

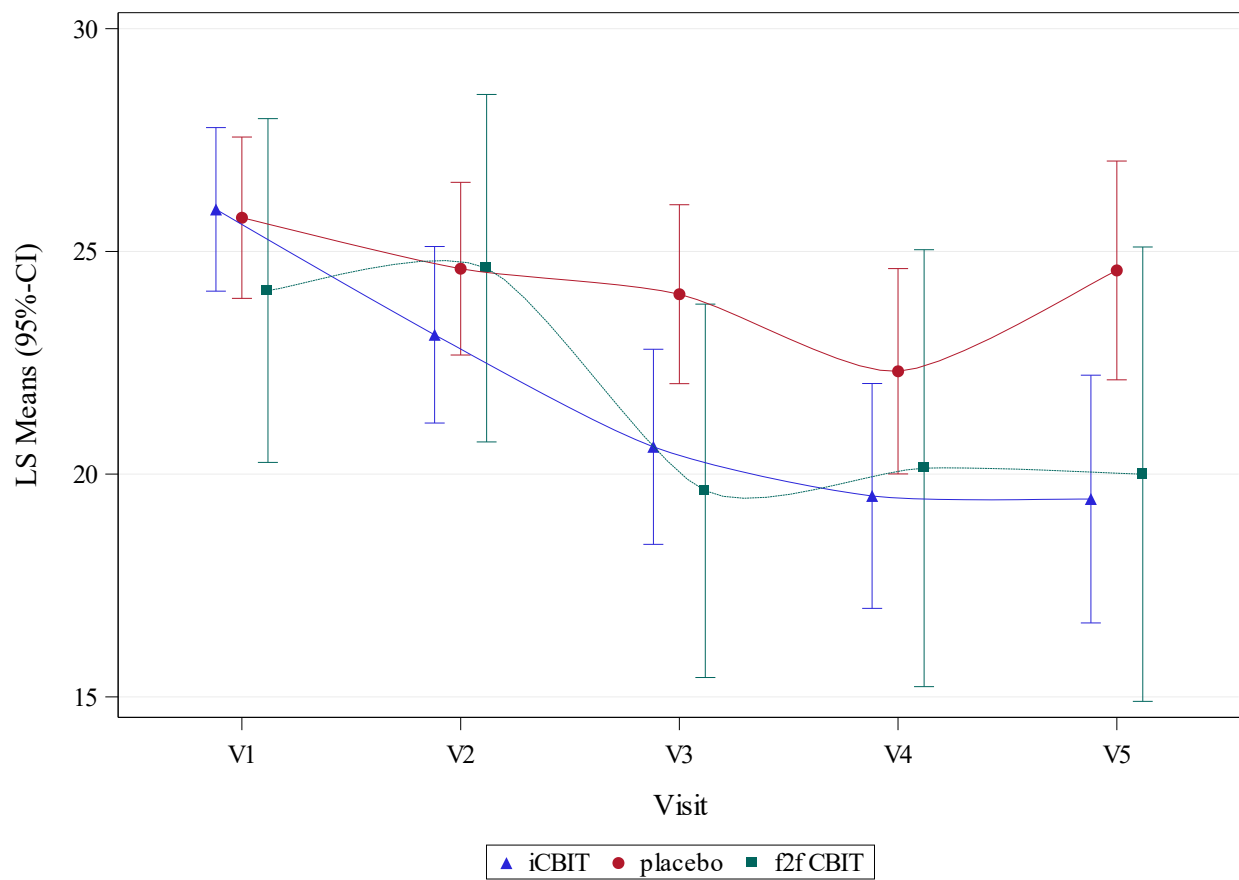

**Figure S3.** Course of YGTSS-impairment across all visits in all study arms.
